# Supplementary material for: An M-estimator for reduced-rank system identification
Source: PubMed Central journal article supplement — Pattern Recognit Lett. Author manuscript; Available in PMC 2018 Jan 30. (PMC5790321; doi:10.1016/j.patrec.2016.12.012), 2016-12-19
Supplement: NIHMS884520-supplement-Supp_data.pdf [file NIHMS884520-supplement-Supp_data.pdf]

## Appendix 1: Standard Kalman Filter Smoother

---

**Algorithm** Standard Kalman Filter Smoother for estimating the moments required in the E-step of an EM algorithm for a linear dynamical system

---

0. Define  $\mathbf{x}_t^\tau = \mathbb{E}(\mathbf{x}_t | \mathbf{Y}_1^\tau)$ ,  $\mathbf{V}_t^\tau = \text{Var}(\mathbf{x}_t | \mathbf{Y}_1^\tau)$ ,  $\hat{\mathbf{x}}_t \equiv \mathbf{x}_t^T$  and  $\hat{P}_t \equiv V_t^T + \mathbf{x}_t^T \mathbf{x}_t^{T\top}$

1. Forward Recursions:

$$\begin{aligned} \mathbf{x}_t^{t-1} &= \mathbf{A} \mathbf{x}_{t-1}^{t-1} \\ \mathbf{V}_t^{t-1} &= \mathbf{A} \mathbf{V}_{t-1}^{t-1} + \mathbf{Q} \\ K_t &= \mathbf{V}_t^{t-1} \mathbf{C}^\top (\mathbf{C} \mathbf{V}_t^{t-1} \mathbf{C}^\top + R)^{-1} \\ \mathbf{x}_t^t &= \mathbf{x}_t^{t-1} + K_t (\mathbf{y}_t - \mathbf{C} \mathbf{x}_t^{t-1}) \\ V_t^t &= V_t^{t-1} - K_t \mathbf{C} V_t^{t-1} \\ \mathbf{x}_1^0 &= \pi_0, V_1^0 = \mathbf{V}_0 \end{aligned}$$

2. Backward Recursions:

$$\begin{aligned} J_{t-1} &= V_{t-1}^{t-1} \mathbf{A}^\top (V_t^{t-1})^{-1} \\ \mathbf{x}_{t-1}^T &= \mathbf{x}_{t-1}^{t-1} + J_{t-1} (\mathbf{x}_t^T - \mathbf{A} \mathbf{x}_{t-1}^{t-1}) \\ V_{t-1}^T &= V_{t-1}^{t-1} + J_{t-1} (V_t^T - V_t^{t-1}) J_{t-1}^\top \\ \hat{P}_{t,t-1} &\equiv V_{t,t-1}^T + \mathbf{x}_t^T \mathbf{x}_t^{T\top} \\ V_{T,T-1}^T &= (\mathbf{I} - K_T \mathbf{C}) \mathbf{A} V_{T-1}^{T-1} \end{aligned}$$


---

## Appendix 2: Derivation of The EM Algorithm

By the chain rule, the full likelihood is

$$\begin{aligned} P(\mathbf{X}, \mathbf{Y}) &= P(\mathbf{Y} | \mathbf{X}) P(\mathbf{X}) = P(\mathbf{x}_0) \prod_{t=1}^T P(\mathbf{x}_t | \mathbf{x}_{t-1}) \prod_{t=1}^T P(\mathbf{y}_t | \mathbf{x}_t) \\ &= \prod_{t=1}^T P(\mathbf{x}_t | \mathbf{x}_{t-1}) \prod_{t=1}^T P(\mathbf{y}_t | \mathbf{x}_t) \mathbb{1}_{\pi_0}(\mathbf{x}_0) \end{aligned}$$

where  $\mathbb{1}_{\pi_0}(\mathbf{x}_0)$  is the indicator function. Conditional likelihoods are

$$\begin{aligned} P(\mathbf{y}_t | \mathbf{x}_t) &= (2\pi)^{-\frac{p}{2}} |R|^{-\frac{1}{2}} \exp \left\{ -\frac{1}{2} [\mathbf{y}_t - \mathbf{C} \mathbf{x}_t]^\top R^{-1} [\mathbf{y}_t - \mathbf{C} \mathbf{x}_t] \right\} \\ P(\mathbf{x}_t | \mathbf{x}_{t-1}) &= (2\pi)^{-\frac{d}{2}} \exp \left\{ -\frac{1}{2} [\mathbf{x}_t - \mathbf{A} \mathbf{x}_{t-1}]^\top [\mathbf{x}_t - \mathbf{A} \mathbf{x}_{t-1}] \right\} \end{aligned}$$

Then the log-likelihood, after dropping a constant, is just a sum of quadratic terms:

$$\begin{aligned} \log P(\mathbf{X}, \mathbf{Y}) = & - \sum_{t=1}^T \left( \frac{1}{2} [\mathbf{y}_t - C\mathbf{x}_t]^\top R^{-1} [\mathbf{y}_t - C\mathbf{x}_t] \right) - \frac{T}{2} \log |R| \\ & - \sum_{t=1}^T \left( \frac{1}{2} [\mathbf{x}_t - A\mathbf{x}_{t-1}]^\top [\mathbf{x}_t - A\mathbf{x}_{t-1}] \right) - \frac{T}{2} \log |\mathbf{I}| \\ & + \log(\mathbb{1}_{\pi_0}(\mathbf{x}_0)). \end{aligned}$$

Then the optimization problem boils down to

$$\begin{aligned} \hat{\theta} = \operatorname{argmin}_{\theta} \left\{ \sum_{t=1}^T \left( \frac{1}{2} [\mathbf{y}_t - C\mathbf{x}_t]^\top R^{-1} [\mathbf{y}_t - C\mathbf{x}_t] \right) - \frac{T}{2} \log |R| \right. \\ \left. + \sum_{t=1}^T \left( \frac{1}{2} [\mathbf{x}_t - A\mathbf{x}_{t-1}]^\top [\mathbf{x}_t - A\mathbf{x}_{t-1}] \right) - \frac{T}{2} \log |\mathbf{I}| \right. \\ \left. - \log(\mathbb{1}_{\pi_0}(\mathbf{x}_0)) + \lambda_1 \|A\|_1 + \lambda_2 \|C\|_2^2 \right\} \quad (1) \end{aligned}$$

Let the target function in the curly braces be denoted as  $\Phi(\theta, \mathbf{Y}, \mathbf{X})$ . Then  $\Phi$  can be optimized with **MR. SID**, a generalized Expectation-Maximization (EM) algorithm.

## E Step

The E step of EM requires computation of the expected log likelihood,  $\Gamma = E[\log P(\mathbf{X}, \mathbf{Y}) | \mathbf{Y}]$ . This quantity depends on three expectations:  $E[\mathbf{x}_t | \mathbf{Y}]$ ,  $E[\mathbf{x}_t \mathbf{x}_t^\top | \mathbf{Y}]$  and  $E[\mathbf{x}_t \mathbf{x}_{t-1}^\top | \mathbf{Y}]$ . For simplicity, we denote their finite sample estimators by:

$$\hat{\mathbf{x}}_t \equiv E[\mathbf{x}_t | \mathbf{Y}], \quad \hat{P}_t \equiv E[\mathbf{x}_t \mathbf{x}_t^\top | \mathbf{Y}], \quad \hat{P}_{t,t-1} \equiv E[\mathbf{x}_t \mathbf{x}_{t-1}^\top | \mathbf{Y}]. \quad (2)$$

Expectations (2) are estimated with a Kalman filter/smoothen (KFS), which is detailed in the Appendix. Notice that all expectations are taken with respect to the current estimations of parameters.

## M Step

Each of the parameters in  $\theta = \{A, C, R, \pi_0\}$  is estimated by taking the corresponding partial derivatives of  $\Phi(\theta, \mathbf{Y}, \mathbf{x})$ , setting them to zero, and then solving the equations.

Let the estimations from the previous step be denoted as  $\theta^{\text{old}} = \{A^{\text{old}}, C^{\text{old}}, R^{\text{old}}, \pi_0^{\text{old}}\}$  and the current estimations as  $\theta^{\text{new}} = \{A^{\text{new}}, C^{\text{new}}, R^{\text{new}}, \pi_0^{\text{new}}\}$ . The estimation for the  $R$  matrix has a closed form, as follows:

$$\begin{aligned} \frac{\partial \Phi}{\partial R^{-1}} &= \frac{T}{2}R - \sum_{t=1}^T \left( \frac{1}{2} \mathbf{y}_t \mathbf{y}_t^\top - C \hat{\mathbf{x}}_t \mathbf{y}_t^\top + \frac{1}{2} C \hat{P}_t C^\top \right) = 0 \\ \implies R &= \frac{1}{T} \sum_{t=1}^T (\mathbf{y}_t \mathbf{y}_t^\top - C \hat{\mathbf{x}}_t \mathbf{y}_t^\top) \\ \implies R^{\text{new}} &= \text{diag} \left\{ \frac{1}{T} \sum_{t=1}^T (\mathbf{y}_t \mathbf{y}_t^\top - C^{\text{new}} \hat{\mathbf{x}}_t \mathbf{y}_t^\top) \right\} \end{aligned}$$

In the bottom line,  $\text{diag}$  extracts only the diagonal of the in-bracket term, as we constrain  $R$  to be diagonal in Constraint 4.

The estimation for  $\pi_0$  has a closed form. The relevant term  $\log(\mathbb{1}_{\pi_0}(\hat{\mathbf{x}}_0))$  is minimized only when  $\pi_0^{\text{new}} = \hat{\mathbf{x}}_0$ .

The estimation for the  $C$  matrix also has a closed form. Terms relevant to  $C$  are

$$f_{\lambda_2}(C; \mathbf{X}, \mathbf{Y}) = \sum_{t=1}^T \left( \frac{1}{2} [\mathbf{y}_t - C \mathbf{x}_t]^\top R^{-1} [\mathbf{y}_t - C \mathbf{x}_t] \right) + \lambda_2 \|C\|_2. \quad (3)$$

In  $f_{\lambda_2}(C; \mathbf{X}, \mathbf{Y})$ ,  $C$  is a matrix, we vectorized it to ease optimization and notation. Without loss of generality, assume  $R$  is the identity matrix in equation (3); otherwise, one can always write equation (3) as

$$\sum_{t=1}^T \left( \frac{1}{2} [R^{-\frac{1}{2}} \mathbf{y}_t - R^{-\frac{1}{2}} C \mathbf{x}_t]^\top [R^{-\frac{1}{2}} \mathbf{y}_t - R^{-\frac{1}{2}} C \mathbf{x}_t] \right) + \lambda_2 \|R^{-\frac{1}{2}} C\|$$

Let  $\mathbf{Y}' = (y_{11}, \dots, y_{T1}, y_{12}, \dots, y_{T2}, \dots, y_{1p}, \dots, y_{Tp})^\top$  be a  $Tp \times 1$  vector from rearranging  $\mathbf{Y}$ . In addition, let

$$\mathbf{X}' = \begin{pmatrix} \mathbf{X}^\top & & \\ & \ddots & \\ & & \mathbf{X}^\top \end{pmatrix}_{pT \times pd}.$$

Finally, vectorize  $C^{\text{old}}$  as

$$\mathbf{c}^{\text{old}} = (C_{11}^{\text{old}}, \dots, C_{1d}^{\text{old}}, C_{21}^{\text{old}}, \dots, C_{2d}^{\text{old}}, C_{p1}^{\text{old}}, \dots, C_{pd}^{\text{old}})^\top \quad (4)$$

where  $C_{ij}$  is the element at row  $i$  and column  $j$  of  $C$ . With these new notations, the equation (3) is equivalent to

$$f_{\lambda_2}(C; \mathbf{X}, \mathbf{Y}) = \|\mathbf{Y}' - \mathbf{X}'\mathbf{c}\|_2^2 + \lambda_2\|\mathbf{c}\|_2^2. \quad (5)$$

With the Tikhonov regularization, equation (5) has closed form solution

$$\begin{aligned} \mathbf{c}^{\text{new}} &= (\mathbf{X}'^T \mathbf{X}' + \lambda_2 \mathbf{I})^{-1} \mathbf{X}'^T \mathbf{Y}' \\ C^{\text{new}} &= \text{Rearrange } \mathbf{c}^{\text{new}} \text{ by equation (4)} \end{aligned}$$

In  $f_{\lambda_2}(C; \mathbf{X}, \mathbf{Y})$ ,  $C$  is a matrix. To simplify notation and optimization, we vectorized it to a vector  $\mathbf{c}$  following the methods of Turlach et al. (2005). A closed form solution for  $\mathbf{c}$ , denoted  $\mathbf{c}^{\text{new}}$ , is given by the Tikhonov regularization. By rearranging the elements in  $\mathbf{c}^{\text{new}}$ , one gets an estimation of matrix  $C$ . That is,

$$C^{\text{new}} = \text{Rearrange } \mathbf{c}^{\text{new}}$$

Now consider matrix  $A$ . Terms involving  $A$  in Eq. (1) are

$$f_{\lambda_1}(A; \mathbf{X}, \mathbf{Y}) = \sum_{t=1}^T \left( \frac{1}{2} [\mathbf{x}_t - A\mathbf{x}_{t-1}]^T [\mathbf{x}_t - A\mathbf{x}_{t-1}] \right) + \lambda_1 \|A\|_1$$

Similar to what we have done to  $C$ ,  $f_{\lambda_1}(A; \mathbf{X}, \mathbf{Y})$  is equivalent to

$$f_{\lambda_1}(A; \mathbf{X}, \mathbf{Y}) = \|\mathbf{z} - \mathbf{Z}\mathbf{a}\|_2^2 + \lambda_1 \|\mathbf{a}\|_1$$

where  $\mathbf{z}$  is a  $Td \times 1$  vector obtained by rearranging  $\mathbf{X}$ , and  $\mathbf{Z}$  is a block diagonal matrix with diagonal component  $\mathbf{Z}^T = (\mathbf{x}_0, \dots, \mathbf{x}_{T-1})^T$ .

$f_{\lambda_1}(A; \mathbf{X}, \mathbf{Y})$  does not have a closed form solution due to the  $\ell_1$  term. However, it can be solved numerically with a Fast Iterative Shrinkage-Thresholding Algorithm (FISTA). The FISTA algorithm is detailed in the Appendix.

With FISTA, matrix  $A$  can be updated as follows:

$$A^{\text{new}} = \text{FISTA}(\|\mathbf{Z}^T \mathbf{a}^{\text{old}} - \mathbf{z}\|_2^2, \lambda_1)$$

## 0.1 Initialization

The  $R$  matrix is initialized as the identity matrix, while  $\pi_0$  is initialized as the  $\mathbf{0}$  vector. For  $A$  and  $C$ , denote  $\mathbf{Y} = [\mathbf{y}_1, \dots, \mathbf{y}_T]$ , a  $p \times T$  matrix, then the singular value decomposition (SVD) of  $\mathbf{Y}$  is  $\mathbf{Y} = \mathbf{U}\mathbf{D}\mathbf{V}^\top \approx \mathbf{U}_{p \times d}\mathbf{D}_{d \times d}\mathbf{V}_{d \times T}^\top = \mathbf{U}_{p \times d}\mathbf{X}_{d \times T}$ , where  $\mathbf{U}_{p \times d}$  is the first  $d$  columns of  $\mathbf{U}$  and  $\mathbf{D}_{d \times d}$  is the upper left block of  $\mathbf{D}$ . This notation also applies to  $\mathbf{V}_{d \times T}^\top$ .

$C$  is then initialized as  $\mathbf{U}_{p \times d}$ , while the columns of  $\mathbf{X}_{d \times T}$  are used as input for a vector autoregressive (VAR) model to estimate the initial value for  $A$ .

## 0.2 Improving Computational Efficiency

The major factors that affect the efficiency and scalability of the above EM algorithm involve the storage and computations of the covariance matrix  $R$ , which is a  $p \times p$  matrix. The following computational techniques are utilized to make the code highly efficient and scalable. For the covariance matrix  $R$ , with constraint 4 (i.e. the diagonal assumption), we employ a sparse matrix to represent  $R$ , and only the diagonal elements are directly calculated. In the E-step, the term  $K_t = V_t^{t-1}C^\top(CV_t^{t-1}C^\top + R)^{-1}$  involves the inverse of a large square  $p \times p$  matrix, which might be intractable. The Woodbury Matrix Identity is employed to turn a high dimensional matrix inverse to a low dimensional one:  $(CV_t^{t-1}C^\top + R)^{-1} = R^{-1} - R^{-1}C[(V_t^{t-1})^{-1} + C^\top R^{-1}C]^{-1}C^\top R^{-1}$ .

Note that quantities like  $R^{-1}$  and  $C^\top R^{-1}C$  can be pre-computed and reused throughout the E step. With the above three techniques, the EM algorithm can scale to very high dimensions in terms of  $p$ ,  $d$ , and  $T$ , without causing any computational issues.

## Appendix 3: FISTA Algorithm

In general, FISTA optimize a target function

$$\min_{\mathbf{x} \in \mathcal{X}} \mathbf{F}(\mathbf{x}; \lambda) = \mathbf{g}(\mathbf{x}) + \lambda \|\mathbf{x}\|_1 \quad (6)$$

where  $\mathbf{g} : R^n \rightarrow R$  is a continuously differentiable convex function and  $\lambda > 0$  is the regularization parameter. A FISTA algorithm with constant step is detailed below

---

**Algorithm** FISTA( $\mathbf{g}, \lambda$ ).

---

1. Input an initial guess  $\mathbf{x}_0$  and Lipschitz constant  $\mathbf{L}$  for  $\nabla \mathbf{g}$ , set  $\mathbf{y}_1 = \mathbf{x}_0, t_1 = 1$
  2. Choose  $\tau \in (0, 1/\mathbf{L}]$ ; Set  $k \leftarrow 0$ .
  3. **loop**
  4.     Evaluate  $\nabla \mathbf{g}(\mathbf{y}_k)$
  5.     Compute  $\mathbf{x}_1 = \mathbf{S}_{\tau\lambda}(\mathbf{y}_k - \tau \nabla \mathbf{g}(\mathbf{y}_k))$
  6.     Compute  $t_{k+1} = \frac{1 + \sqrt{1 + 4t_k^2}}{2}$
  7.      $\mathbf{y}_{k+1} = \mathbf{x}_k + \left(\frac{t_k - 1}{t_{k+1}}\right)(\mathbf{x}_k - \mathbf{x}_{k-1})$
  8.     Set  $k \leftarrow k + 1$
  9. **end loop**
- 

In the above

$$\mathbf{S}_\lambda(\mathbf{y}) = (|\mathbf{y}| - \lambda)_+ \mathbf{sign}(\mathbf{y}) = \begin{cases} y - \lambda & \text{if } y > \lambda \\ y + \lambda & \text{if } y < -\lambda \\ 0 & \text{if } |y| \leq \lambda. \end{cases}$$

The Lipschitz constant  $L$  for  $\nabla \mathbf{g}(\mathbf{z}) = \mathbf{Z}^\top (\mathbf{Z}\mathbf{a} - \mathbf{z})$ , where  $\mathbf{g}(\mathbf{z}) = \|\mathbf{Z}^\top \mathbf{a} - \mathbf{z}\|_2^2$ , is calculated as follows. Denote  $\|Z\|$  as the induced norm of matrix  $Z$ , then  $L$  is

$$L = \sup_{x \neq y} \frac{\|\mathbf{Z}^\top (\mathbf{Z}x - \mathbf{Z}y)\|}{\|x - y\|} = \sup_{x \neq 0} \frac{\|\mathbf{Z}^\top \mathbf{Z}x\|}{\|x\|} \leq \|\mathbf{Z}^\top\| \|\mathbf{Z}\| = \|\mathbf{Z}^\top\| \|\mathbf{Z}\|.$$

## Appendix 4: $k$ -step predictions with PCA and MR. SID

---

**Algorithm**  $k$ -step predictions with PCA and MR. SID

---

1. Denote estimations with PCA and MR. SID as  $A_{pca}, C_{pca}, A_{plds}$ , and  $C_{plds}$  respectively.
  2. PCA estimated latent states at  $t = 1000$ :  $x_{1000,pca}$  = column 1000 of  $\mathbf{X}_{d \times T}$  from Section 3.3
  3. MR. SID estimated latent states at  $t = 1000$ :  $x_{1000,pls}$  is from the E step in Section 3.4
  4. **for**  $i = 1$  **to**  $k$
  5.      $x_{1000+k,pca} = A_{pca} x_{999+k,pca}$
  6.      $y_{1000+k,pca} = C_{pca} x_{1000+k,pca}$
  7.      $x_{1000+k,pls} = A_{plds} x_{999+k,pls}$
  8.      $y_{1000+k,pls} = C_{plds} x_{1000+k,pls}$
  9. **end**
-

## Appendix 5: Simulation Data Generation

---

**Algorithm** Simulation Data Generation

---

1. Denote the dimensions as  $p$ ,  $d$  and  $T$  respectively
  2. Generate a  $p \times d$  matrix  $C_0$  from a standard Gaussian distribution
  3. Sort each column of  $C_0$  in ascending order to get matrix  $C$
  4. Generate a  $d \times d$  matrix  $A_0$  from a standard Gaussian distribution
  5. Add a multiple of the identity matrix to  $A_0$
  6. Replace entries in  $A_0$  with small absolute values with 0
  7. Scale  $A_0$  to make sure its eigen values are between  $-1$  and  $1$ ; use  $A_0$  as the A matrix
  8. Let  $R$  be a diagonal matrix with positive diagonal entries and  $Q$  be the identity matrix
  9. Generate simulation data with  $A, C, Q$  and  $R$
  10. **end**
-
